# Supplementary material for: Energy transfer from Bi3+ to Ho3+ triggers brilliant single green light emission in LaNbTiO6:Ho3+, Bi3+ phosphors
Source: Royal Society of Chemistry journal article supplement (doi:10.1039/c3ra47833e), 2014-01-01
Supplement: c3ra47833e1.pdf [file c3ra47833e1.pdf]

## Supporting Information

### 1. The synthesis process of Ho<sup>3+</sup>-doped LaNbTiO<sub>6</sub>

Firstly, 0.5 mmol Nb<sub>2</sub>O<sub>5</sub> was dissolved with excess hydrofluoric acid in a water bath at 90 °C, and the pH of the NbF<sub>5</sub> solution was regulated to 9.0 by adding ammonia aqueous solution. Then, the white precipitate of niobic acid obtained was filtered and washed with deionized water for several times to make sure that the F<sup>-</sup> ions were completely removed. Afterward, the precipitate of niobic acid was dissolved with tetra-n-butyl titanate and citric acid with the mole ratio of 1:1:3 under heating at 80 °C. Then, tetra-n-butyl titanate, holmium nitrate, lanthanum nitrate, and ammonium nitrate were added into the solution. The mole ratio of tetra-n-butyl titanate and ammonium nitrate is 1:15. The doped concentration of Ho<sup>3+</sup> in all metal ions M (La<sup>3+</sup> and Ho<sup>3+</sup>) is 0.5, 1, 2, 3, 4 and 5 mol%, respectively. The doped concentration is the proportion of Ho<sup>3+</sup>. The obtained solution was mixed homogeneously under continuous stirring and heating at 80 °C for 4~5 hours until the sol formed. After the water evaporated, the transparent sol turned into gel with high viscosity. The gel was dried at 120 °C for 16 hours to form yellow xerogel. The obtained xerogels were then introduced into crucibles, then directly transferred into a muffle furnace annealed at 1100 °C for 1 h, respectively. Finally, all samples were ground into powder for characterization.

### 2. The synthesis process of Bi<sup>3+</sup>-doped LaNbTiO<sub>6</sub>

Firstly, 0.5 mmol Nb<sub>2</sub>O<sub>5</sub> was dissolved with excess hydrofluoric acid in a water bath at 90 °C, and the pH of the NbF<sub>5</sub> solution was regulated to 9.0 by adding

ammonia aqueous solution. Then, the white precipitate of niobic acid obtained was filtered and washed with deionized water for several times to make sure that the F<sup>-</sup> ions were completely removed. Afterward, the precipitate of niobic acid was dissolved with tetra-n-butyl titanate and citric acid with the mole ratio of 1:1:3 under heating at 80 °C. Then, tetra-n-butyl titanate, bismuth nitrate, lanthanum nitrate, and ammonium nitrate were added into the solution. The mole ratio of tetra-n-butyl titanate and ammonium nitrate is 1:15. The doped concentration of Bi<sup>3+</sup> in all metal ions M (La<sup>3+</sup> and Bi<sup>3+</sup>) is 2 mol%. The obtained solution was mixed homogeneously under continuous stirring and heating at 80 °C for 4~5 hours until the sol formed. After the water evaporated, the transparent sol turned into gel with high viscosity. The gel was dried at 120 °C for 16 hours to form yellow xerogel. The obtained xerogels were then introduced into crucibles, then directly transferred into a muffle furnace annealed at 1100 °C for 1 h, respectively. Finally, all samples were ground into powder for characterization.

### **3. The synthesis process of Ho<sup>3+</sup> and Bi<sup>3+</sup>co-doped LaNbTiO<sub>6</sub>**

Firstly, 0.5 mmol Nb<sub>2</sub>O<sub>5</sub> was dissolved with excess hydrofluoric acid in a water bath at 90 °C, and the pH of the NbF<sub>5</sub> solution was regulated to 9.0 by adding ammonia aqueous solution. Then, the white precipitate of niobic acid obtained was filtered and washed with deionized water for several times to make sure that the F<sup>-</sup> ions were completely removed. Afterward, the precipitate of niobic acid was dissolved with tetra-n-butyl titanate and citric acid with the mole ratio of 1:1:3 under heating at 80 °C. Then, tetra-n-butyl titanate, bismuth nitrate, lanthanum nitrate, and

ammonium nitrate were added into the solution. The mole ratio of tetra-n-butyl titanate and ammonium nitrate is 1:15. The doped concentration of  $\text{Ho}^{3+}$  is 4 mol% and the doped concentration of  $\text{Bi}^{3+}$  in all metal ions M ( $\text{La}^{3+}$ ,  $\text{Ho}^{3+}$  and  $\text{Bi}^{3+}$ ) is 0, 1, 2, 3, 4 and 5 mol%. The obtained solution was mixed homogeneously under continuous stirring and heating at 80 °C for 4~5 hours until the sol formed. After the water evaporated, the transparent sol turned into gel with high viscosity. The gel was dried at 120 °C for 16 hours to form yellow xerogel. The obtained xerogels were then introduced into crucibles, then directly transferred into a muffle furnace annealed at 1100 °C for 1 h, respectively. Finally, all samples were ground into powder for characterization.
